# Supplementary material
Source: HighWire-hosted journal article supplement (https://bmjopen.bmj.com/content/8/4/e019663)
Supplement: inline-supplementary-material-1 [file inline-supplementary-material-1.pdf]

Supplementary Material I: Topic Guide

| Topic Guide                                                                                                                                                                                                                                                                                                                                                                      |                                                                                                                                                                                                                                                                                                                                                                                                                                 |                                                                                                                                                                                                                                                                                                                                                                                                                                                                                                                                             |                                                                                                                                                                                                                                                                                                                                                                                                        |
|----------------------------------------------------------------------------------------------------------------------------------------------------------------------------------------------------------------------------------------------------------------------------------------------------------------------------------------------------------------------------------|---------------------------------------------------------------------------------------------------------------------------------------------------------------------------------------------------------------------------------------------------------------------------------------------------------------------------------------------------------------------------------------------------------------------------------|---------------------------------------------------------------------------------------------------------------------------------------------------------------------------------------------------------------------------------------------------------------------------------------------------------------------------------------------------------------------------------------------------------------------------------------------------------------------------------------------------------------------------------------------|--------------------------------------------------------------------------------------------------------------------------------------------------------------------------------------------------------------------------------------------------------------------------------------------------------------------------------------------------------------------------------------------------------|
| Pre-intervention                                                                                                                                                                                                                                                                                                                                                                 | End of phase one<br>(External regulation;<br>Introjected regulation)                                                                                                                                                                                                                                                                                                                                                            | End of phase two<br>(Introjected regulation; Identified<br>regulation)                                                                                                                                                                                                                                                                                                                                                                                                                                                                      | 12 months post-baseline follow up<br>(Integrated motivation)                                                                                                                                                                                                                                                                                                                                           |
| <p><b>Explore the barriers and facilitators to PA</b></p> <p>What stops you from being physically active?<br/>(Relational support)</p> <p>Role of parents/friends in your PA? (Autonomy support; Relational support)</p> <p>Any ideas to increase PA?<br/>(Autonomy support)</p> <p>Opportunities for PA within school/community?<br/>(Autonomy support; Relational support)</p> | <p><b>Explore the experiences of StepSmart</b></p> <p>How easy is it to find ways in which to be more active?<br/>(Autonomy support)</p> <p>Did completing the StepSmart Challenge with friends make it easier? Or more pressure?<br/>(Autonomy support; Relational support)</p> <p>Do you enjoy telling people about your success in terms of PA (e.g. showing others your steps)?<br/>(Perceived competence; Relatedness)</p> | <p><b>Explore the how participants felt about the different competition elements</b></p> <p>How did the team competition compare to the individual competition?<br/>(Relational support)</p> <p>Some of the class were more/less active than you. How did you feel when you compared your steps to the class?<br/>(Perceived competence)</p> <p>Did team members encourage you to be active or not?<br/>(Autonomy support)</p> <p>How did you feel if you didn't contribute to the team/school's step count?<br/>(Perceived competence)</p> | <p><b>Explore if there has been a change in PA (formation of habit)</b></p> <p>One year on: how active are you now (compared to before you took part)?</p> <p>Did you make changes to your PA? Why/why not? (<i>changes to routine ... active travel, walking with friends etc.</i>)</p> <p>If you did make any changes, which are you still doing? What strategies helped?<br/>(Autonomy support)</p> |
| <p><b>Explore the acceptability of the intervention components</b></p> <p>Have you ever heard of...or used a pedometer?<br/>What is it you (dis)like about them?</p> <p>Feelings on writing down your own daily steps goals in a workbook.</p>                                                                                                                                   | <p><b>Explore the attitude towards PA</b></p> <p>Do you enjoy PA?</p> <p>What are your main reasons for being active? (i.e. role of the prizes and other elements?)</p>                                                                                                                                                                                                                                                         | <p><b>Explore how the StepSmart Challenge instigated any changes in participants PA</b></p> <p>How do you feel about PA since the StepSmart Challenge?</p> <p>What have you enjoyed?</p>                                                                                                                                                                                                                                                                                                                                                    | <p><b>Explore how participants felt about the StepSmart Challenge</b></p> <p>Why did you choose to participate?</p> <p>Good/not so good aspects of the competition?</p> <p>Did the competition motivate – no/at beginning/all throughout?</p>                                                                                                                                                          |

|                                                                                                                                                                                                                                                                                                                   |                                                                                                                                                                                                                                                                                                                              |                                                                                                                                                                                                                                                                                                                                                                                |                                                                                                                                                                                                                                                                                                                                                                                                                                                                                                                                      |
|-------------------------------------------------------------------------------------------------------------------------------------------------------------------------------------------------------------------------------------------------------------------------------------------------------------------|------------------------------------------------------------------------------------------------------------------------------------------------------------------------------------------------------------------------------------------------------------------------------------------------------------------------------|--------------------------------------------------------------------------------------------------------------------------------------------------------------------------------------------------------------------------------------------------------------------------------------------------------------------------------------------------------------------------------|--------------------------------------------------------------------------------------------------------------------------------------------------------------------------------------------------------------------------------------------------------------------------------------------------------------------------------------------------------------------------------------------------------------------------------------------------------------------------------------------------------------------------------------|
| <p>(Perceived competence; Autonomy support)</p> <p>What features of a website would you find appealing?</p> <p>How do you feel about entering a school-based competition?</p> <p>Any advantages/disadvantages to team vs individual competitions</p> <p>What prizes would motivate young people to take part?</p> | <p>Do you enjoy finding new ways of becoming more active?<br/>(Autonomy support)</p> <p>Do you think your motivation towards PA has changed?</p>                                                                                                                                                                             | <p>Has the StepSmart Challenge increased your PA? If not, what would motivate you to be more active?</p> <p>Since the StepSmart Challenge, what new opportunities have you found to be active?<br/>(Autonomy support)</p> <p>Anything outside your control stopping you from being active? (e.g. park proximity, family, other)<br/>(Autonomy support; Relational support)</p> |                                                                                                                                                                                                                                                                                                                                                                                                                                                                                                                                      |
|                                                                                                                                                                                                                                                                                                                   | <p><b>To explore the consequences of PA</b></p> <p>Do you find yourself having more energy?</p> <p>Do you feel more confident in being able to achieve things?<br/>(Perceived competence)</p> <p>How do you feel after you've completed some PA?</p> <p>Do you think you are more active now than when you started? Why?</p> | <p><b>Explore how participants felt about the use of the pedometer</b></p> <p>How often did you use the pedometer? What did you like/dislike about it? (e.g. Feedback)<br/>(Perceived competence; Autonomy support)</p> <p>How many of you are still using the pedometer? Why?</p>                                                                                             | <p><b>Explore how participants felt about the team/individual competition</b></p> <p>Class vs school, was one enjoyed more?<br/>(Autonomy support; Relational support)</p> <p>Influence of friends on being active?<br/>(Autonomy support; Relational support)</p> <p>Opportunity to make new friends?<br/>(Relational support)</p> <p>Feelings about not contributing to the team/school step count?<br/>(Perceived competence)</p> <p>More motivated if friends wanted to do well in the competition?<br/>(Relational support)</p> |

|  |  |                                                                                                                                                                                                                                                                                                                                   |                                                                                                                                                                                                                                                                                                                                                                                                                                                                                   |
|--|--|-----------------------------------------------------------------------------------------------------------------------------------------------------------------------------------------------------------------------------------------------------------------------------------------------------------------------------------|-----------------------------------------------------------------------------------------------------------------------------------------------------------------------------------------------------------------------------------------------------------------------------------------------------------------------------------------------------------------------------------------------------------------------------------------------------------------------------------|
|  |  | <p><b>Explore how participants felt about the rewards/prizes</b></p> <p>What did you think of the prizes?</p> <p>Tell me how well they worked to motivate you?</p> <p>How did you feel if you didn't win a prize?<br/>(Perceived competence)</p> <p>If no prizes, but still a competition, would you still be as active? Why?</p> | <p><b>Explore how participants felt about the rewards/prizes</b></p> <p>Type of prizes preferred, including trophy or a certificate?</p> <p>Not competing against others, but beating your own goal?<br/>(Autonomy support; Perceived competence)</p>                                                                                                                                                                                                                             |
|  |  | <p><b>Explore how the website and Facebook group were used</b></p> <p>Things you liked/didn't like about the website?</p> <p>What did you think of Facebook group?<br/>(Autonomy support; Relational support)</p> <p>Which way would you prefer to get your information from?<br/>(Autonomy support)</p>                          | <p><b>Mood/motivation did these change at different stages of the intervention?</b></p> <p>Feelings if didn't make as many steps as others? Did that affect your mood?<br/>(Perceived competence; Relational support)</p> <p>If you did/didn't do well - did that motivate/demotivate you?<br/>(Perceived competence; Relational support)</p> <p>If felt like don't have a good chance to win would that make you stop trying?<br/>(Perceived competence; Relational support)</p> |

Red text illustrates how items in the topic guide are linked the concepts of self-determination theory
